# Supplementary material for: Knowledge, Attitudes, and Acceptance of COVID-19 Vaccines among Secondary School Pupils in Zambia: Implications for Future Educational and Sensitisation Programmes
Source: MDPI journal article supplement (doi:10.3390/vaccines10122141), 2022-12-14
Supplement: s1 [file s1]

# Knowledge, attitude, and acceptance of COVID-19 vaccines<sub>1</sub> among secondary school pupils in Zambia: implications for<sub>2</sub> future educational and sensitisation programmes<sub>3</sub>

4

| Part I: Sociodemographic characteristics of pupils                              |                        |                            |
|---------------------------------------------------------------------------------|------------------------|----------------------------|
| SN                                                                              | Questions              | Answers/choice             |
| 1                                                                               | Age                    | years                      |
| 2                                                                               | Grade                  |                            |
| 3                                                                               | School                 |                            |
| 4                                                                               | Gender                 | 1. Male<br>2. Female       |
| 5                                                                               | Where do you live?     |                            |
| 6                                                                               | Whom do you live with? | 1. Parents<br>2. Guardians |
| Part II: Knowledge questions about COVID-19 vaccine [circle the correct answer] |                        |                            |

|                                                         |                                                                            |                                                                                                |
|---------------------------------------------------------|----------------------------------------------------------------------------|------------------------------------------------------------------------------------------------|
| 1                                                       | Have you ever heard about the COVID-19 vaccine?                            | 1. Yes<br>2.No                                                                                 |
| 2                                                       | If said "yes "to question 1 above, what is the main source of information? | 1. Healthcare workers<br>2. TV/radio<br>3. Social media<br>4. Family/friends<br>5. Others..... |
| 3                                                       | Do you know currently people taking the COVID-19 vaccine?                  | 1. Yes 2.No 3. I don't know                                                                    |
| 4                                                       | Do you think COVID-19 vaccines reduce disease transmission?                | 1. Yes 2.No 3. I don't know                                                                    |
| 5                                                       | Do you think the use of COVID-19 vaccines has side effects?                | 1. Yes 2.No 3. I don't know                                                                    |
| Part III: Attitude questions about the COVID-19 vaccine |                                                                            |                                                                                                |

|                                                                            |                                                                          |                             |
|----------------------------------------------------------------------------|--------------------------------------------------------------------------|-----------------------------|
| 1                                                                          | Taking the COVID-19 vaccine is important for our health.                 | 1. Yes 2.No 3. I don't know |
| 2                                                                          | I will take the COVID-19 vaccine without any fear.                       | 1. Yes 2.No 3. I don't know |
| 3                                                                          | I will encourage my family /friends to take the COVID-19 vaccine.        | 1. Yes 2.No 3. I don't know |
| 4                                                                          | COVID-19 vaccine should be distributed fairly to all of us.              | 1. Yes 2.No 3. I don't know |
| 5                                                                          | I support currently recommended COVID-19 vaccine campaigns and programs. | 1. Yes 2.No 3. I don't know |
| Part IV: Factors influencing participants' acceptance of COVID-19 vaccines |                                                                          |                             |
| 1                                                                          | Have you ever suffered from COVID-19?                                    | 1. Yes 2.No 3. I don't know |

|   |                                                                                                                                 |                             |
|---|---------------------------------------------------------------------------------------------------------------------------------|-----------------------------|
| 2 | Did any of your friends or relatives suffer from COVID-19?                                                                      | 1. Yes 2.No 3. I don't know |
| 3 | Has any of your friends or relatives died from COVID-19?                                                                        | 1. Yes 2.No 3. I don't know |
| 4 | Were you ever quarantined as a result of COVID-19?                                                                              | 1. Yes 2.No 3. I don't know |
| 5 | Are you able to practice physical and social distancing?                                                                        | 1. Yes 2.No 3. I don't know |
| 6 | Are the preventive measures of COVID-19 stressful to follow?                                                                    | 1. Yes 2.No 3. I don't know |
| 7 | Do you suffer from ANY chronic condition (tuberculosis, diabetes mellitus, HIV/AIDs, asthma, bronchitis, hypertension, cancer)? | 1. Yes 2.No 3. I don't know |

|  |                                                           |                                   |
|--|-----------------------------------------------------------|-----------------------------------|
|  | Acceptance of the<br>COVID-19 vaccine                     |                                   |
|  | Would you accept being<br>vaccinated against<br>COVID-19? | 1. Yes 2.No 3. I<br>don't<br>know |

Thank you for your participation!
